# Supplementary material
Source: PubMed Central journal article supplement (PMC3322641)
Supplement: NIHMS367892-supplement-Supp_Fig_S1a-d.pdf [file NIHMS367892-supplement-Supp_Fig_S1a-d.pdf]

Pat 92101

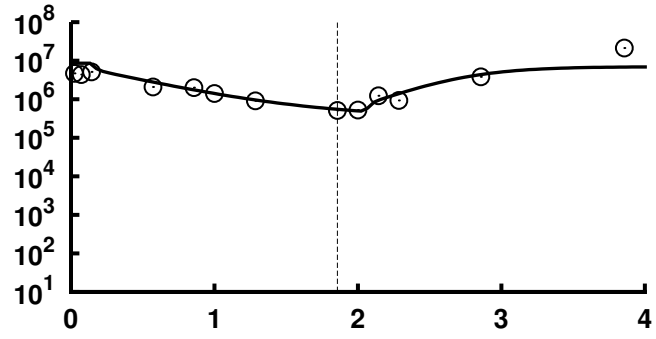

Hepatology

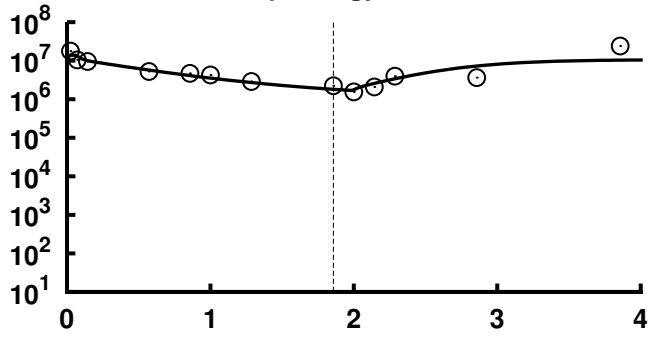

Pat 92103

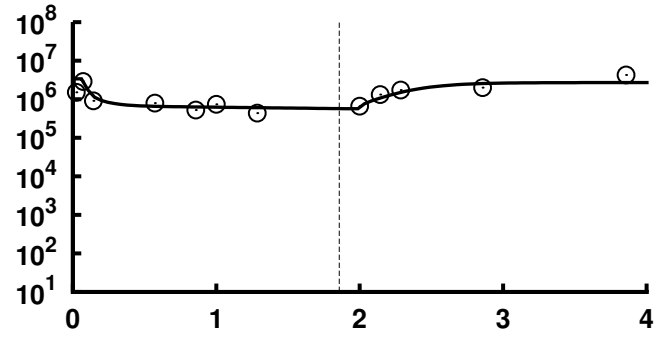

Pat 92105

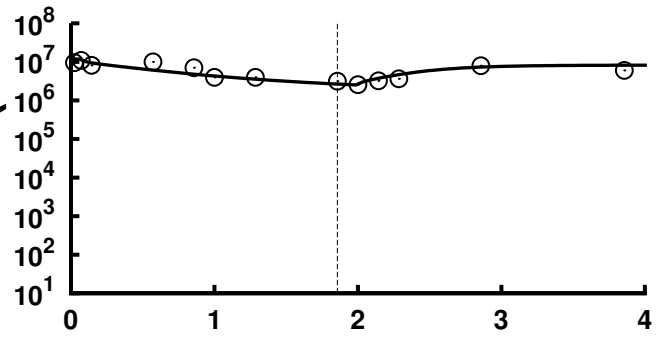

Pat 92106

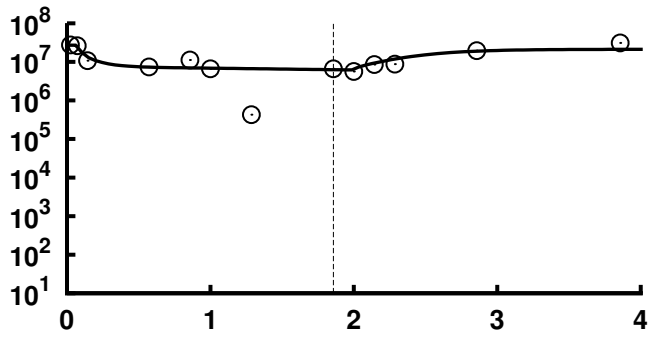

Pat 92107

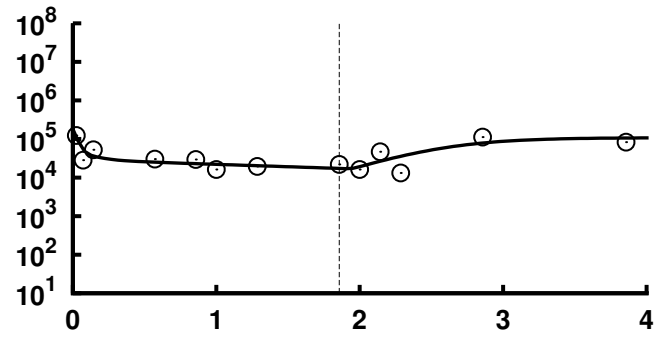

Pat 92108

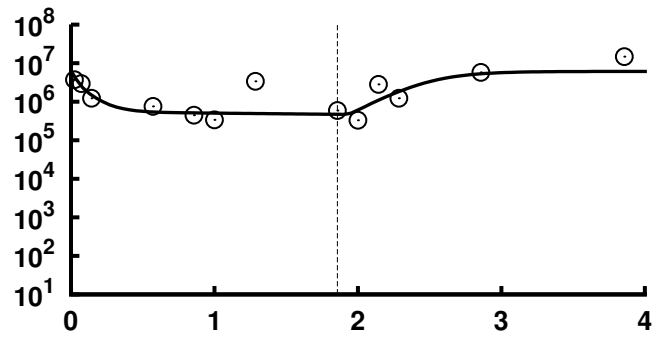

Pat 92110

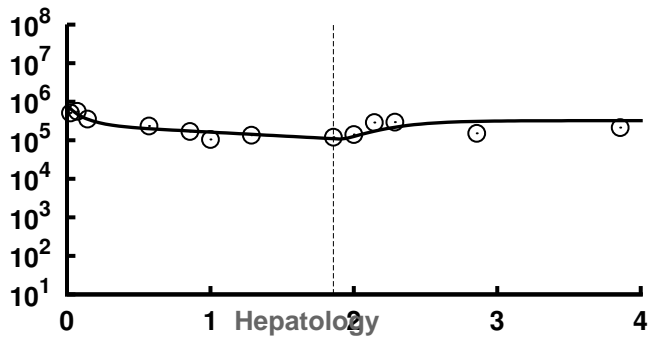

Hepatology

Time post treatment initiation (weeks)

1  
2  
3  
4  
5  
6  
7  
8  
9  
10  
11  
12  
13  
14  
15  
16  
17  
18  
19  
20  
21  
22  
23  
24  
25  
26  
27  
28  
29  
30  
31  
32  
33  
34  
35  
36  
37

Pat 92201

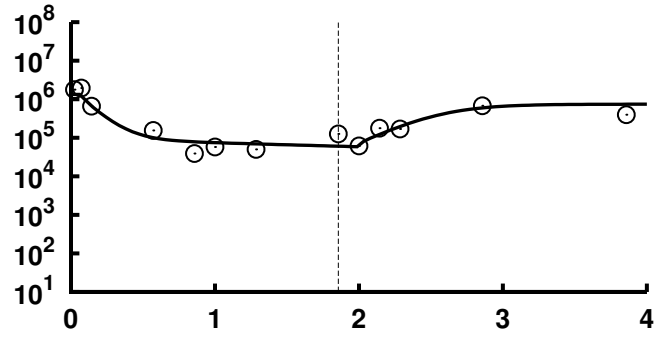

Hepatology  
Pat 92202

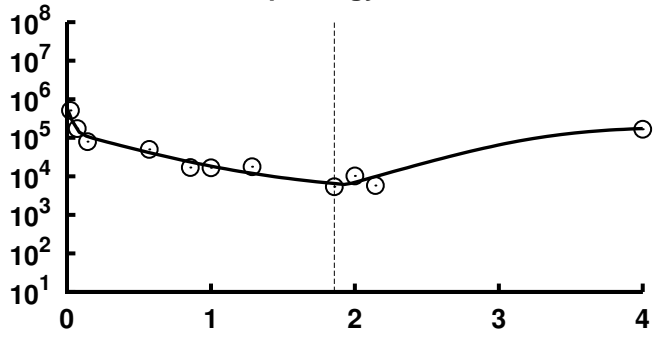

Pat 92205

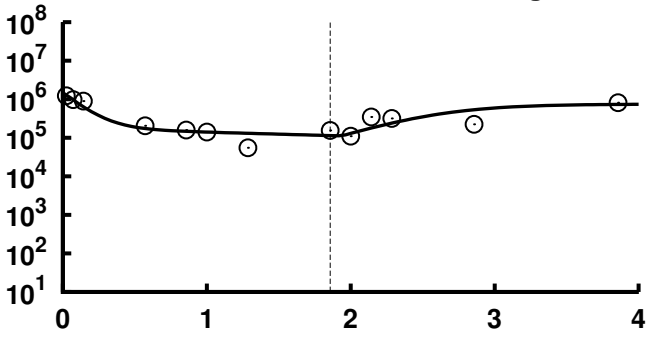

Pat 92206

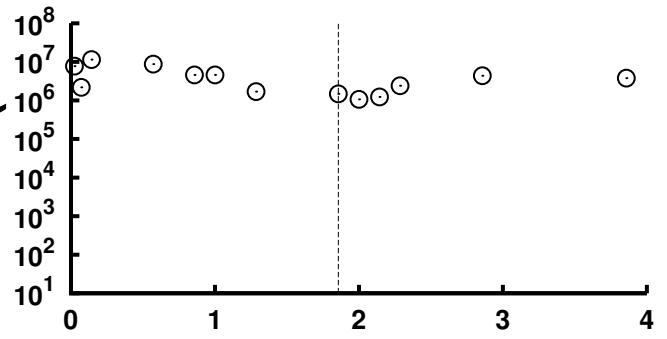

Pat 92207

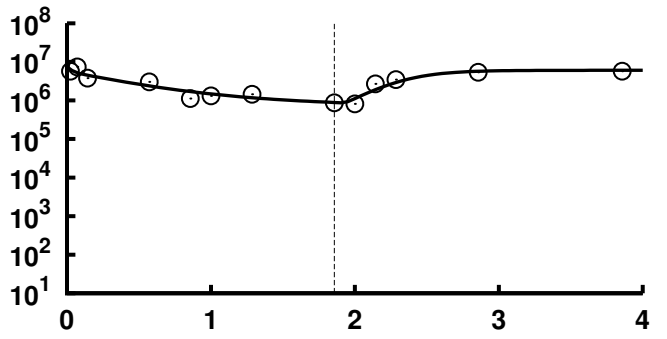

Pat 92208

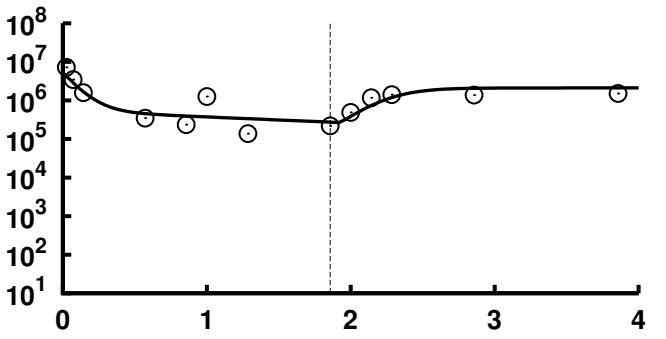

Pat 92209

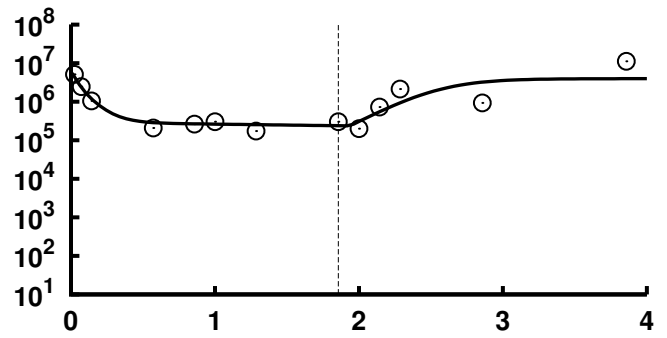

Pat 92210

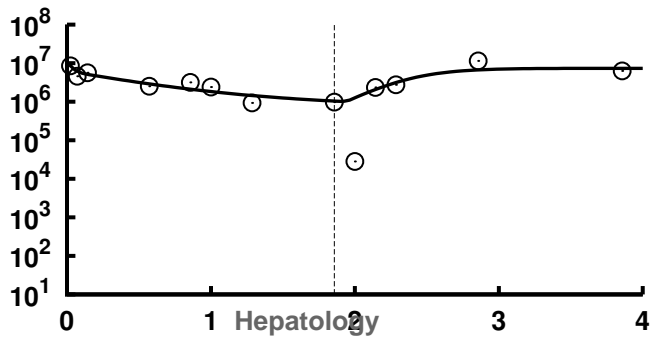

Time post treatment initiation (weeks)

1  
2  
3  
4  
5  
6  
7  
8  
9  
10  
11  
12  
13  
14  
15  
16  
17  
18  
19  
20  
21  
22  
23  
24  
25  
26  
27  
28  
29  
30  
31  
32  
33  
34  
35  
36  
37

Pat 92301

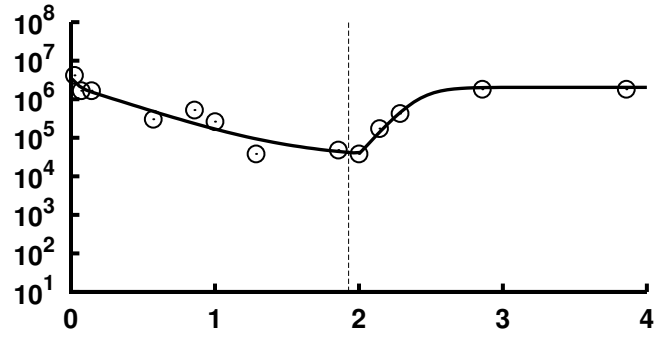

Hepatology

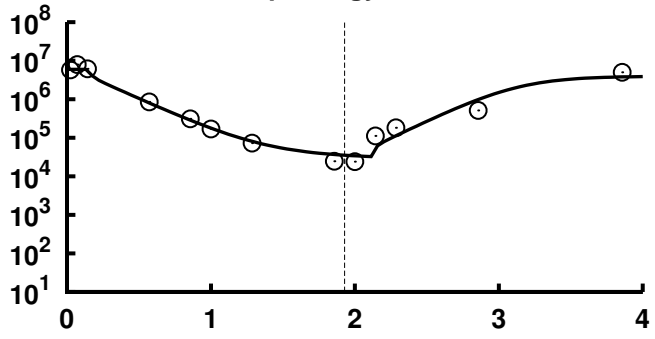

Pat 92304

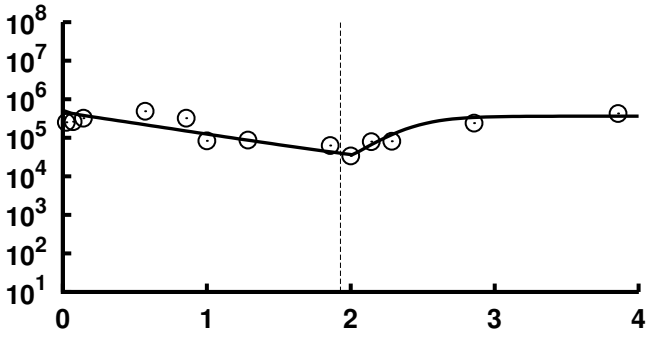

Pat 92305

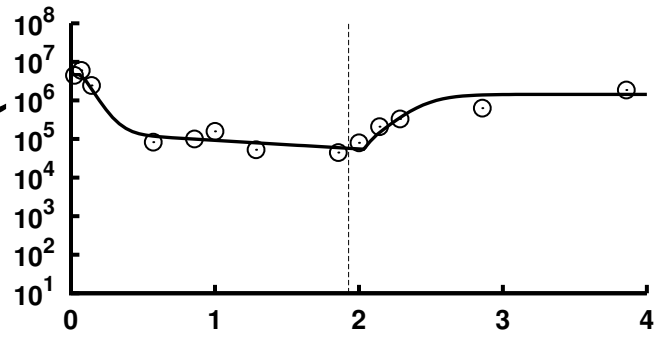

Pat 92306

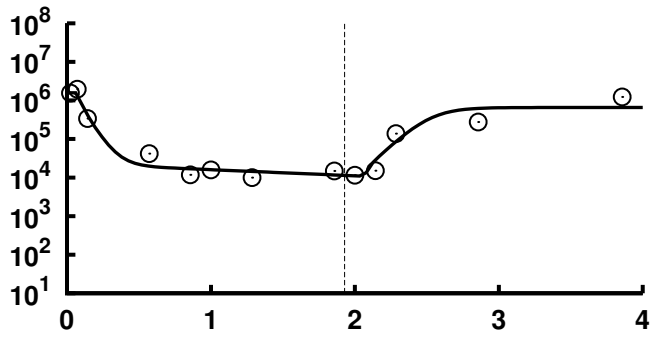

Pat 92307

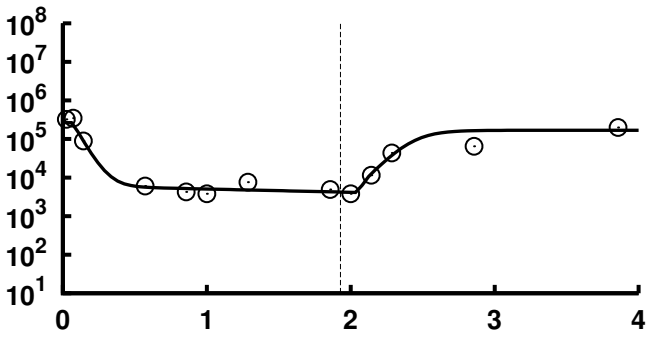

Pat 92309

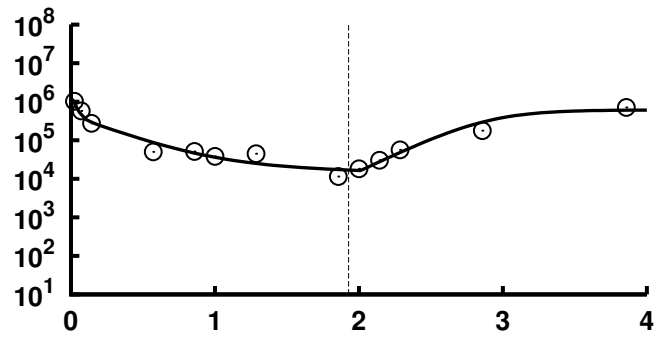

Pat 92310

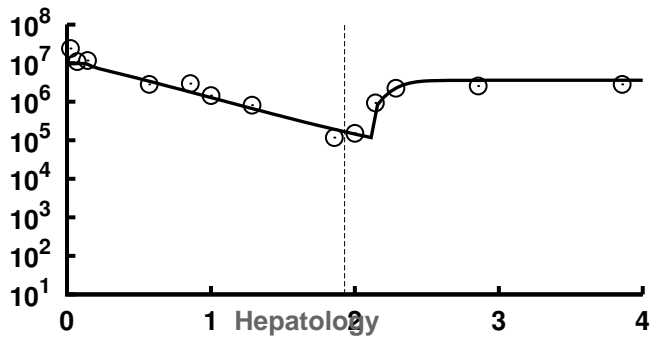

Hepatology

Time post treatment initiation (weeks)

1  
2  
3  
4  
5  
6  
7  
8  
9  
10  
11  
12  
13  
14  
15  
16  
17  
18  
19  
20  
21  
22  
23  
24  
25  
26  
27  
28  
29  
30  
31  
32  
33  
34  
35  
36  
37

Pat 92403

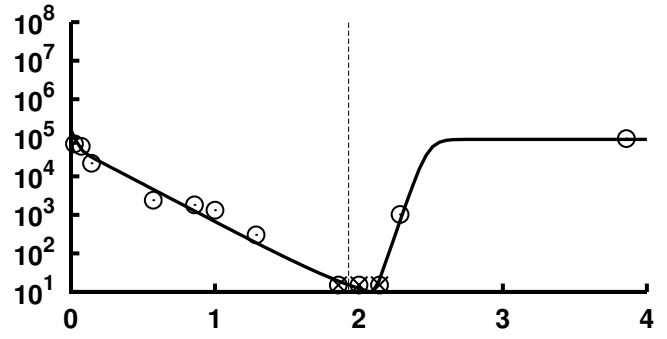

Hepatology  
Pat 92404

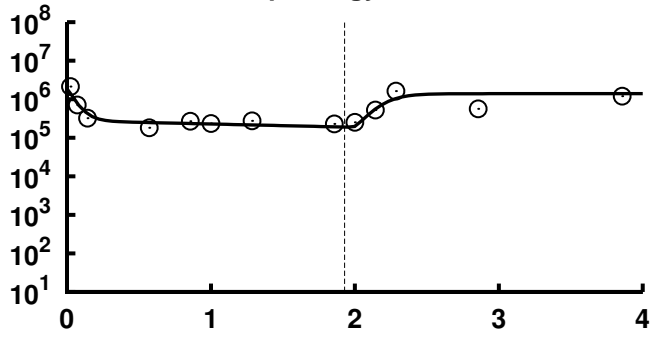

Pat 92405

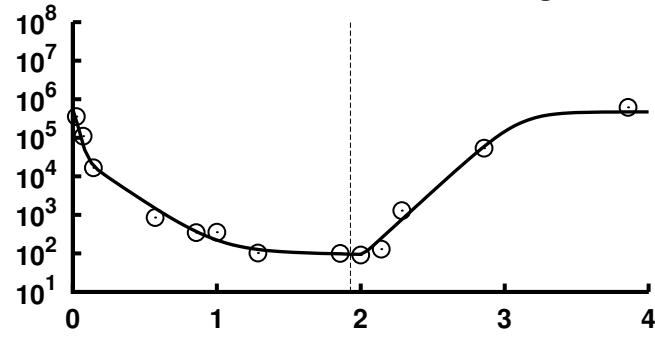

Pat 92406

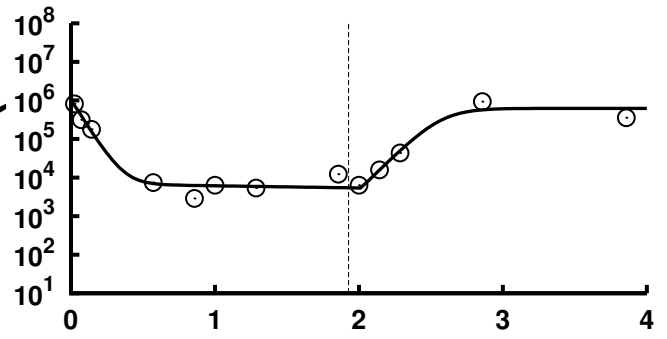

Pat 92407

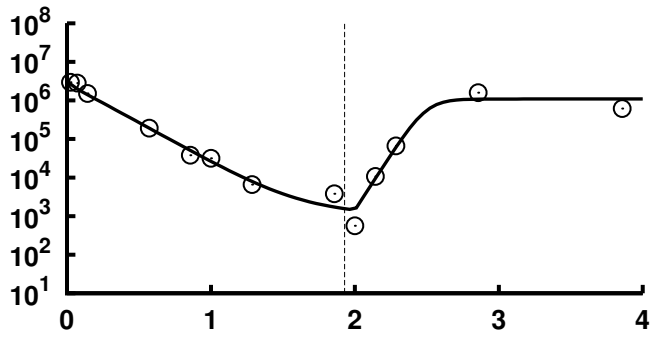

Pat 92408

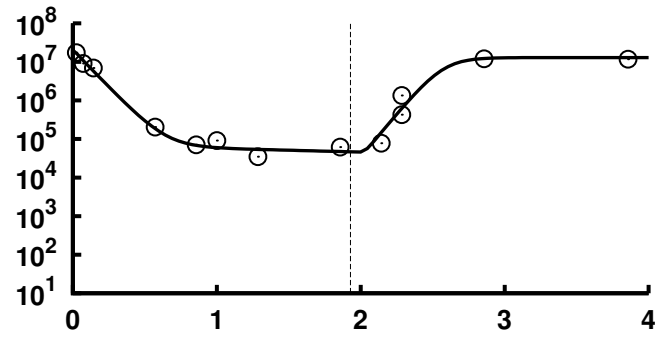

Pat 92409

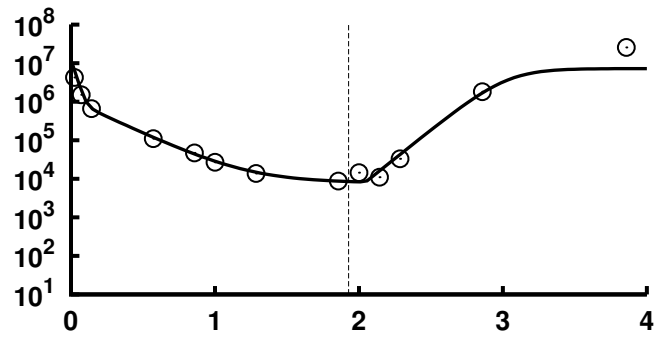

Pat 92410

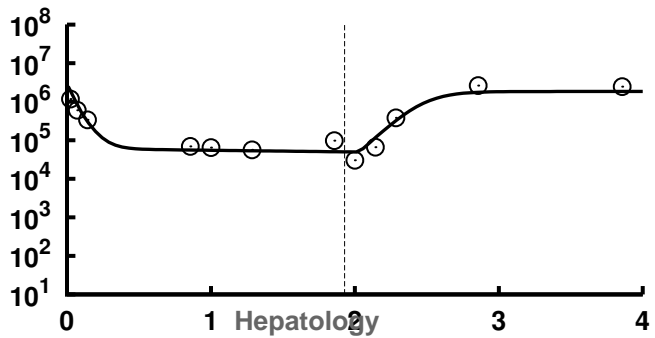

Time post treatment initiation (weeks)

1  
2  
3  
4  
5  
6  
7  
8  
9  
10  
11  
12  
13  
14  
15  
16  
17  
18  
19  
20  
21  
22  
23  
24  
25  
26  
27  
28  
29  
30  
31  
32  
33  
34  
35  
36  
37
